# Supplementary material for: The association between airway eosinophilic inflammation and IL-33 in stable non-atopic COPD
Source: PubMed Central journal article supplement (PMC5984757; doi:10.1186/s12931-018-0807-y), 2018-06-01
Supplement: 12931_2018_807_MOESM4_ESM.pdf [file 12931_2018_807_MOESM4_ESM.pdf]

Table E1

|                 | Age                | Time since diagnosis | Pack-years         | FEV1% of predicted | FEV1/FVC           | CAT                | mMRC               | 6MWT               | BODE              | % of Sputum eosinophils |
|-----------------|--------------------|----------------------|--------------------|--------------------|--------------------|--------------------|--------------------|--------------------|-------------------|-------------------------|
| Serum IL-33     | R=-0.13;<br>p=0.41 | R=-0.05;<br>p=0.71   | R=0.36;<br>p<0.05  | R=0.04;<br>p=0.80  | R=0.26;<br>r=0.10  | R=-0.04;<br>p=0.77 | R=0.11;<br>p=0.48  | R=-0.26;<br>p=0.10 | R=0.21;<br>p=0.17 | R=0.43;<br>p<0.01       |
| Sputum IL-33    | R=-0.00;<br>p=0.97 | R=-0.00;<br>p=0.95   | R=0.16;<br>p=0.31  | R=-0.18;<br>p=0.26 | R=0.05;<br>p=0.74  | R=0.19;<br>p=0.23  | R=0.01;<br>p=0.91  | R=-0.01;<br>p=0.90 | R=0.23;<br>p=0.15 | R=0.48;<br>p<0.01       |
| Serum sST2      | R=-0.21;<br>p=0.17 | R=0.20;<br>p=0.20    | R=-0.04;<br>p=0.79 | R=-0.21;<br>p=0.19 | R=-0.13;<br>p=0.40 | R=0.31;<br>p=0.05  | R=0.12;<br>r=0.42  | R=-0.09;<br>p=0.56 | R=0.24;<br>p=0.13 | R= 0.11;<br>p=0.48      |
| Sputum sST2     | R=0.06;<br>p=0.69  | R=-0.00;<br>p=0.95   | R=0.26;<br>p=0.10  | R=-0.14;<br>p=0.38 | R=-0.14;<br>p=0.37 | R=0.13;<br>p=0.40  | R=-0.07;<br>p=0.66 | R=0.03;<br>p=0.83  | R=0.02;<br>p=0.87 | R=-0.43;<br>p<0.01      |
| PBMC ST2 mRNA   | R=0.03;<br>p=0.21  | R=-0.08;<br>p=0.62   | R=0.05;<br>p=0.71  | R=-0.03;<br>p=0.84 | R=-0.00;<br>p=0.96 | R=0.14;<br>p=0.38  | R=0.26;<br>p=0.10  | R=0.04;<br>p=0.78  | R=0.08;<br>p=0.62 | R=0.033;<br>p<0.05      |
| Sputum ST2 mRNA | R=-0.00;<br>p=0.97 | R=-0.25;<br>p=0.12   | R=-0.19;<br>p=0.24 | R=-0.11;<br>p=0.46 | R=-0.27;<br>p=0.09 | R=-0.09;<br>p=0.56 | R=0.32;<br>p<0.05  | R=0.09;<br>p=0.56  | R=0.19;<br>p=0.21 | R= 0.36;<br>p=0.02      |
