# Supplementary material for: The association between airway eosinophilic inflammation and IL-33 in stable non-atopic COPD
Source: Springer Nature journal article supplement (doi:10.1186/s12931-018-0807-y), 2018-06-01
Supplement: MOESM1 [file 15812422]

## Additional File 1 – Detailed Method Description

### The Association Between Airway Eosinophilic Inflammation and IL-33 in Stable Non-Atopic COPD

Damian Tworek, Sebastian Majewski, Karolina Szewczyk, Justyna Kiszalkiewicz, Zofia Kurmanowska, Paweł Górski, Ewa Brzezińska-Lasota, Piotr Kuna, Adam Antczak

#### Methods:

##### *The COPD assessment test (CAT):*

CAT is a simple, validated health status instrument for patients with COPD. The self-administered questionnaire consists of eight items assessing various manifestations of COPD and global impact of the disease on health status. It is a simple, quantified measure of health-related quality of life. CAT scores range from 0 to 40. A decrease in CAT score represents an improvement in health status, whereas an increase in CAT score represents a worsening in health status (1).

##### *Six-minute walk test (6MWT):*

The 6MWT is used for the evaluation of functional exercise capacity in patients with chronic respiratory diseases. 6MWT will be performed using the methodology specified by the Polish Respiratory Society guidelines (2). Briefly, all COPD patients will be instructed to walk as far as possible for 6 minutes. The 6MWT will be performed in a flat, long, covered, 30 m-long corridor with the metres marked. When the test is finished, the distance covered will be calculated.

##### *The modified Medical Research Council (mMRC) dyspnea scale:*

26 mMRC is a five-level rating scale based on the patient's perception of dyspnea in daily  
27 activities. It consists of five statements that describe the entire range of dyspnea from none  
28 (Grade 0) to almost complete incapacity (Grade 4) (3).

29

30 *BODE index:*

31 The BODE index is a multidimensional scoring system for COPD patients which evaluates  
32 body mass index (BMI), measure of airflow obstruction (FEV1% predicted), dyspnea score  
33 (grade in mMRC scale), and exercise capacity (distance covered in 6MWT). This composite  
34 marker of disease takes into consideration the systemic nature of COPD and is used to predict  
35 long-term outcomes in this population (4).

36

37 *Skin prick testing:*

38 All patients underwent skin prick tests performed with common aeroallergens:  
39 Dermatophagoides pteronyssinus, Dermatophagoides farinae, grasses, birch, hazel, alder,  
40 mugwort, cat, dog, Alternaria tenuis, and Cladosporium herbarum (Allergopharma).  
41 Histamine 1.7 mg/mL (Allergopharma) and standard glycerol saline solution (Allergopharma)  
42 were used as a positive and negative control, respectively. A wheal diameter  $\geq 3$ mm was  
43 considered a positive result.

44

45 *Exhaled breath condensate (EBC):*

46 The EBC was collected using a commercial condenser (Thermo Haake EK20, Ecoscreen,  
47 Jaeger) according to the recommendations of the European Respiratory Society (5). Patients  
48 were asked to breath out spontaneously for 10 min through a mouthpiece equipped with a  
49 saliva trap. The respiratory rate ranged from 15 to 20 breaths/min. All subjects wore a nose

50 clip and rinsed their mouths with distilled water just before and in the seventh minute of  
51 collection in order to reduce nasal contamination.

52 Collected condensate was immediately frozen in -80°C until ELISA measurements.

53

54 *Sputum induction and processing:*

55 Sputum samples were induced using hypertonic saline. Selected mucous plugs were processed  
56 using a two-step method with a Dulbecco's phosphate-buffered saline (D-PBS) wash step  
57 followed by a dithiothreitol (DTT) step and cytopins (6). Sputum supernatants were frozen at  
58 -80 °C. Cytopins were prepared from sputum cells and stained with Diff-Quik for  
59 differential cell counts. Remaining cells were subjected to measurements of ST2 mRNA  
60 expression and flow cytometry staining.

61

62 *Blood samples processing:*

63 Peripheral venous blood samples were withdrawn into lithium heparin tubes (BD Dickenson)  
64 at baseline and at 24 h after the diluent/allergen inhalation challenge. This blood was diluted  
65 with McCoys 5A (Invitrogen) and then layered on Lymphoprep (d = 1.077 mg/ml; Axis-  
66 Shield) and centrifuged at 2,200 rpm for 20 min at room temperature. Peripheral blood  
67 mononuclear cells (PBMC) were removed and washed with McCoy 5A (centrifugation at  
68 1500 rpm for 10 minutes at 4°C). Two million of PBMC per tube were used for staining for  
69 flow cytometry. Remaining cells were kept in -80 °C until mRNA expression analysis.

70

71 *ELISA:*

72 IL-33 and sST2 concentrations in EBC (IL-33 only), serum and sputum supernatants were  
73 measured in duplicate using commercially-available enzyme-linked immunosorbent assays  
74 (R&D) according to manufacturer's instructions. In The sensitivity of the assay was 1.65

75 pg/ml for IL-33 and 13.5 pg/ml for sST2. In the case of values lower than the method  
76 sensitivity limit, the samples were quantified based on extrapolation of standard curves  
77 generated for each set of samples assayed.

78

79 *Gene expression analysis in PBMC and sputum cells:*

80 PBMC and sputum cells were resuspended in RNAlater (ThermoFisher) and kept in  $-80^{\circ}\text{C}$   
81 until RNA isolation. RNA isolation was performed using the mirVana™ miRNA Isolation Kit  
82 (Life Technologies), according to the manufacturer's protocol. The quality and quantity of  
83 isolated RNA was spectrophotometrically assessed (Eppendorf BioPhotometr™ Plus). The  
84 purity of total RNA (ratio of 16S to 18S fraction) was determined in the automated  
85 electrophoresis using the RNA Nano Chips LabChiplates in Agilent 2100 Bioanalyzer  
86 (Agilent Technologies).

87 Complementary DNA (cDNA) was transcribed from 100 ng of total RNA, using a High-  
88 Capacity cDNA Reverse Transcription Kit (Applied Biosystems) in a total volume of 20  $\mu\text{l}$ ,  
89 according to manufacturer's protocol. The relative expression analysis was performed in  
90 7900HT Fast Real-Time PCR System (Applied Biosystems) using TaqMan probes for the  
91 following genes: ST2 (Hs00249384\_m1) and ACTB (Hs99999903\_m1) used as an  
92 endogenous control. The PCR mixture contained cDNA (1 to 100 ng), 20 $\times$  TaqManR Gene  
93 Expression Assay, 2 $\times$  KAPA PROBE Master Mix (2 $\times$ ) ABI Prism Kit (Kapa Biosystems),  
94 and RNase-free water in a total volume of 20  $\mu\text{l}$ . The expression levels (RQ values) of the  
95 studied genes were calculated using the delta delta CT method, with the adjustment to the  $\beta$ -  
96 actin expression level and in relation to the expression level of calibrator (Human Lung Total  
97 RNA Ambion®), for which RQ value was equal to 1.

98

99 *Flow cytometry:*

100 PBMC and sputum cells for flow cytometry experiments were immunostained with isotype or  
101 specific mAbs to the extracellular CD45 (Ebioscience, CA, US), CD34 (Ebioscience) and  
102 ST2 (R&D). To measure intracellular IL-5 expression, cells were washed, fixed and  
103 permeabilized, then stained with isotype control or antibody to IL-5 (R&D). Cells were  
104 washed and acquired with a Canto flow cytometer (BD Biosciences). Analyses were  
105 performed using Flow-Jo software (Tree Star). HPC were defined as  
106  $FSC^{low}SSC^{low}CD45^{dim}CD34^{high}$  population according to the previously described gating  
107 strategy (Figure E4)(7) . The isotype control for the markers of interest was set to 2 %, which  
108 was compared to the specific markers to detect the percentage of cells expressing the marker.  
109

110 **References:**

- 111 1. Jones PW, Harding G, Berry P, Wiklund I, Chen W-H, Kline Leidy N. Development and  
112 first validation of the COPD Assessment Test. *Eur Respir J* 2009;34:648–54.
- 113 2. Przybyłowski T, Tomalak W, Siergiejko Z, Jastrzębski D, Maskey-Warzęchowska M,  
114 Piorunek T, Wojda E, Boros P. Polish Respiratory Society guidelines for the methodology  
115 and interpretation of the 6 minute walk test (6MWT). *Pneumonol Alergol Pol*  
116 2015;83:283–297.
- 117 3. Mahler DA, Wells CK. Evaluation of clinical methods for rating dyspnea. *Chest*  
118 1988;93:580–6.
- 119 4. Cote CG, Celli BR. BODE index: a new tool to stage and monitor progression of chronic  
120 obstructive pulmonary disease. *Pneumonol Alergol Pol* 2009;77:305–13.
- 121 5. Horváth I, Hunt J, Barnes PJ, Alving K, Antczak A, Baraldi E, Becher G, van Beurden  
122 WJC, Corradi M, Dekhuijzen R, Dweik RA, Dwyer T, Effros R, Erzurum S, Gaston B,  
123 Gessner C, Greening A, Ho LP, Hohlfeld J, Jöbsis Q, Laskowski D, Loukides S, Marlin  
124 D, Montuschi P, Olin AC, Redington AE, Reinhold P, van Rensen ELJ, Rubinstein I, *et*  
125 *al.* Exhaled breath condensate: methodological recommendations and unresolved  
126 questions. *Eur Respir J* 2005;26:523–48.
- 127 6. Bafadhel M, McCormick M, Saha S, McKenna S, Shelley M, Hargadon B, Mistry V, Reid  
128 C, Parker D, Dodson P, Jenkins M, Lloyd A, Rugman P, Newbold P, Brightling CE.  
129 Profiling of sputum inflammatory mediators in asthma and chronic obstructive pulmonary  
130 disease. *Respiration* 2012;83:36–44.
- 131 7. Sehmi R, Howie K, Sutherland DR, Schragge W, O’Byrne PM, Denburg JA. Increased  
132 levels of CD34+ hemopoietic progenitor cells in atopic subjects. *Am J Respir Cell Mol*  
133 *Biol* 1996;15:645–55.
