# Supplementary material for: The association between airway eosinophilic inflammation and IL-33 in stable non-atopic COPD
Source: Springer Nature journal article supplement (doi:10.1186/s12931-018-0807-y), 2018-06-01

Figure E1.

**A**

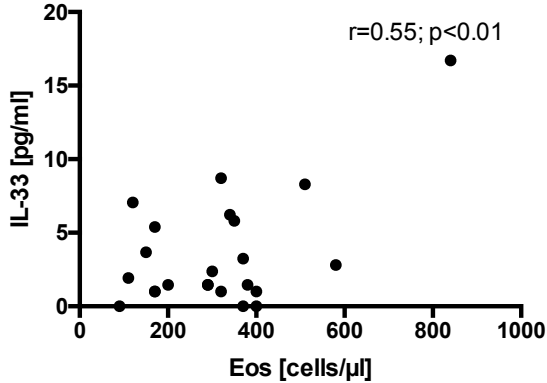

**B**

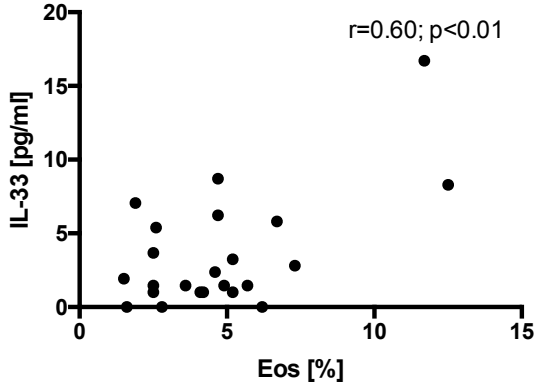

Supplement: MOESM3 [file 15812422]
