# Supplementary material for: The association between airway eosinophilic inflammation and IL-33 in stable non-atopic COPD
Source: Springer Nature journal article supplement (doi:10.1186/s12931-018-0807-y), 2018-06-01

Figure E2.

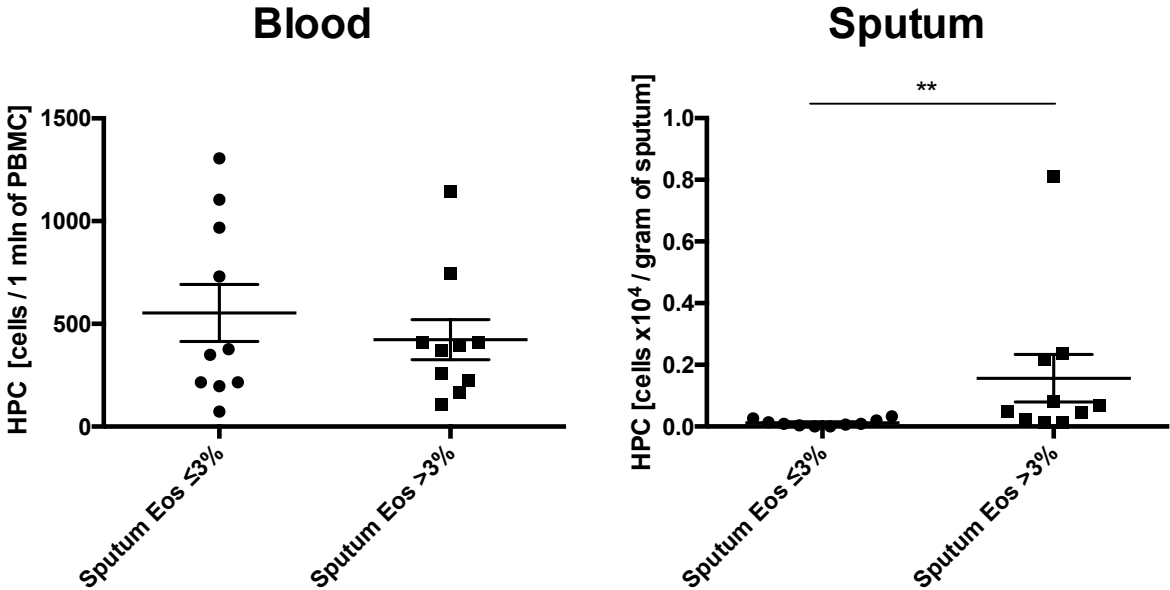

Supplement: MOESM5 [file 15812422]
